# Supplementary material for: Phytochemical Constituents of Adansonia digitata L. (Baobab) Fruit Pulp from Tekeze Valley, Tigrai, Ethiopia
Source: Hindawi journal article supplement (doi:10.1155/2023/5591059), 2023-10-25
Supplement: f1 [file 5591059.f1.pdf]

Library Search Report

Data Path : D:\Data\anjac\2015\ANJAC\noorul islam univ\  
Data File : S4.D  
Acq On : 10 Feb 2020 12:29  
Operator :  
Sample : S4  
Misc :  
ALS Vial : 6 Sample Multiplier: 1

Search Libraries: D:\MassHunter\Library\NIST11.L Minimum Quality: 0

Unknown Spectrum: Apex  
Integration Events: ChemStation Integrator - autoint1.e

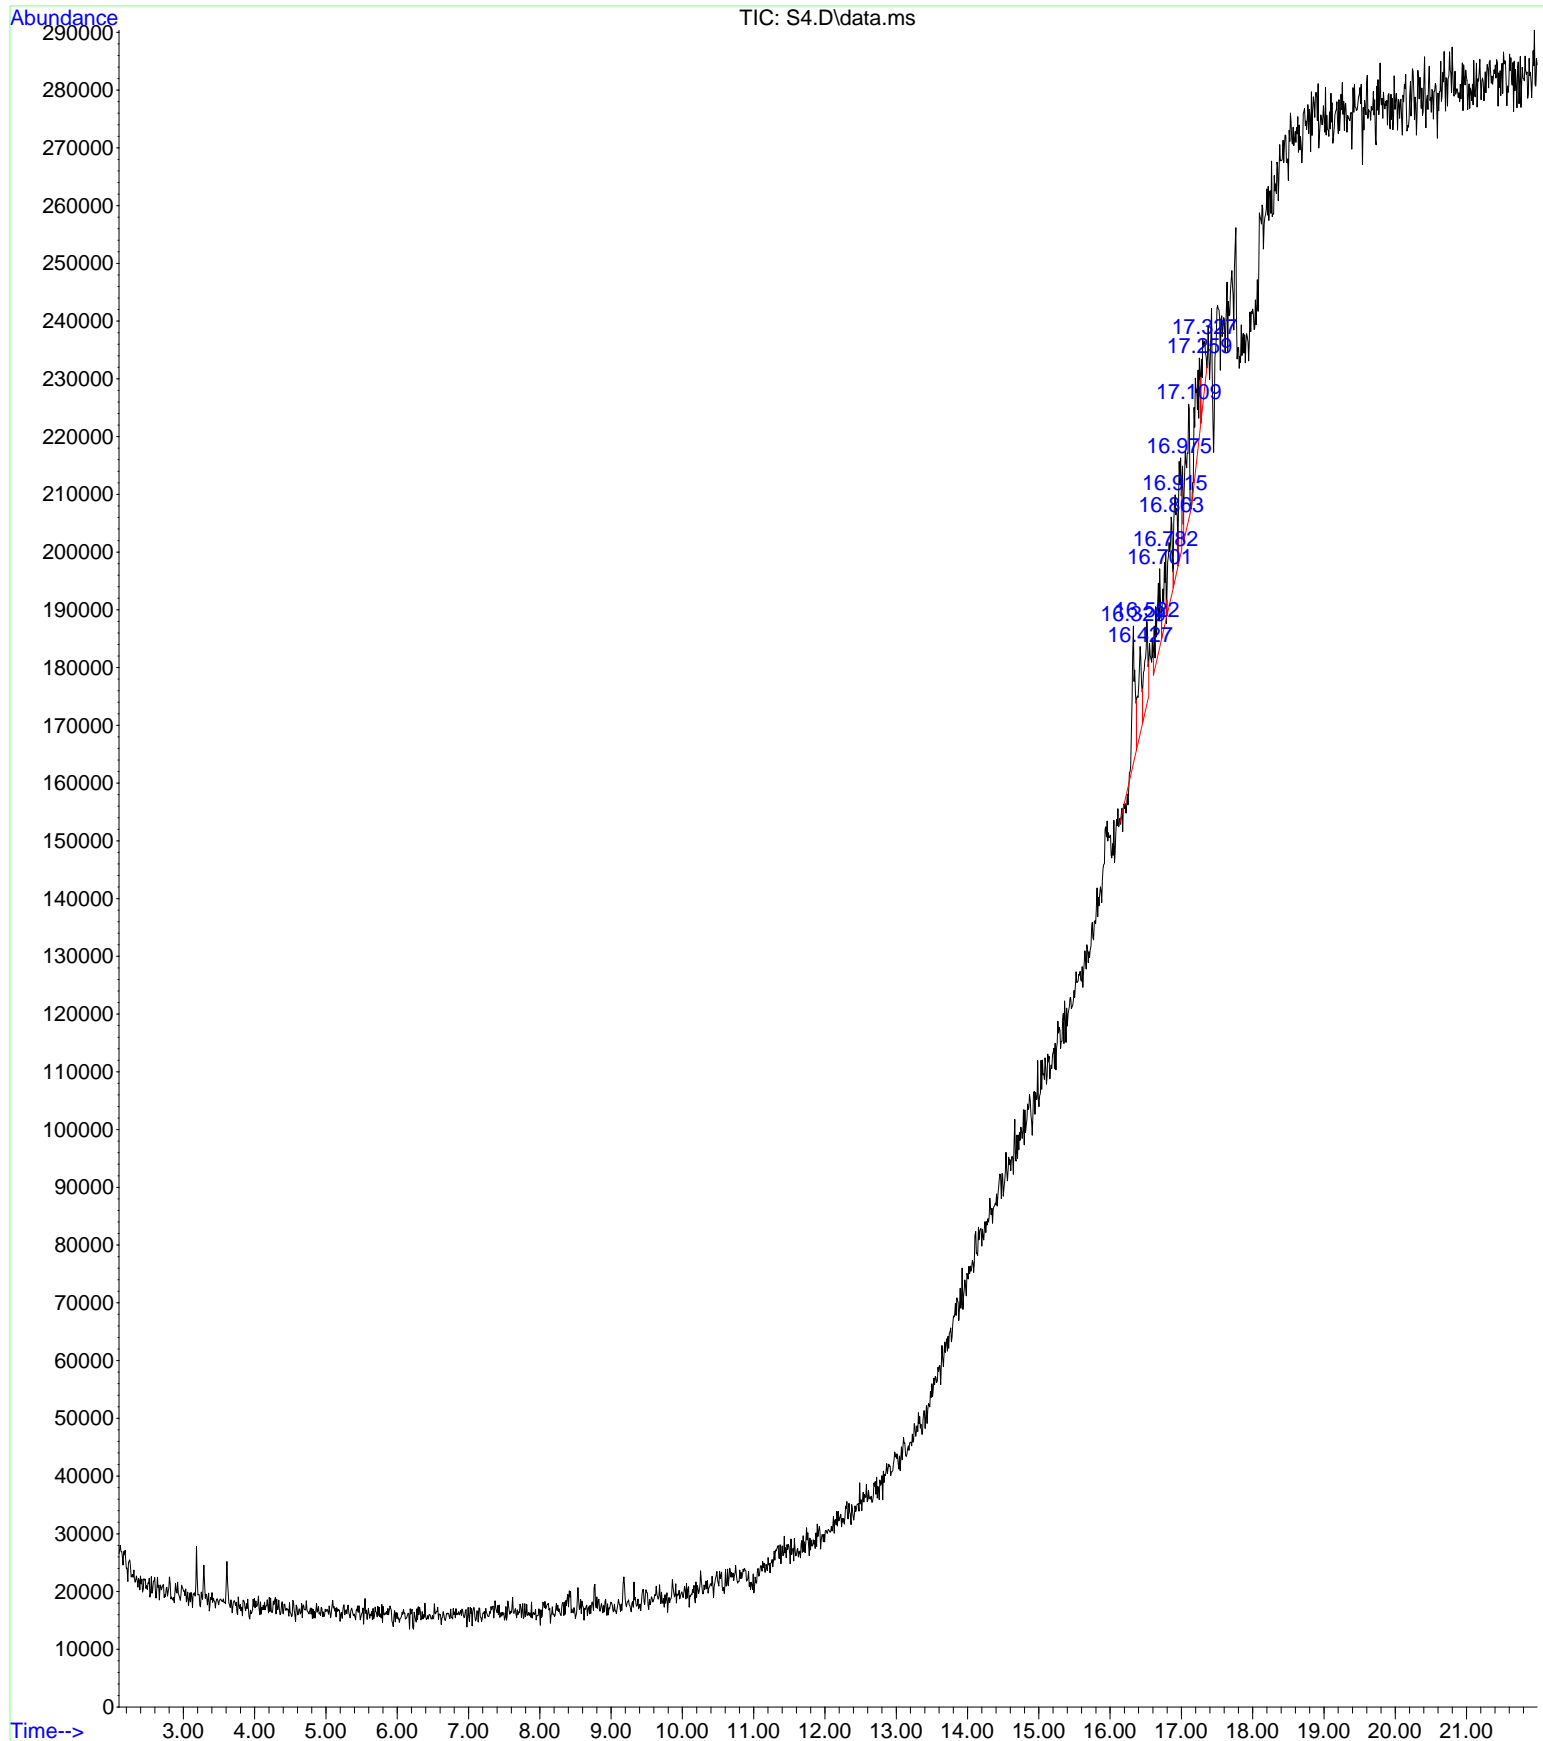

## Unknown Spectrum based on Apex

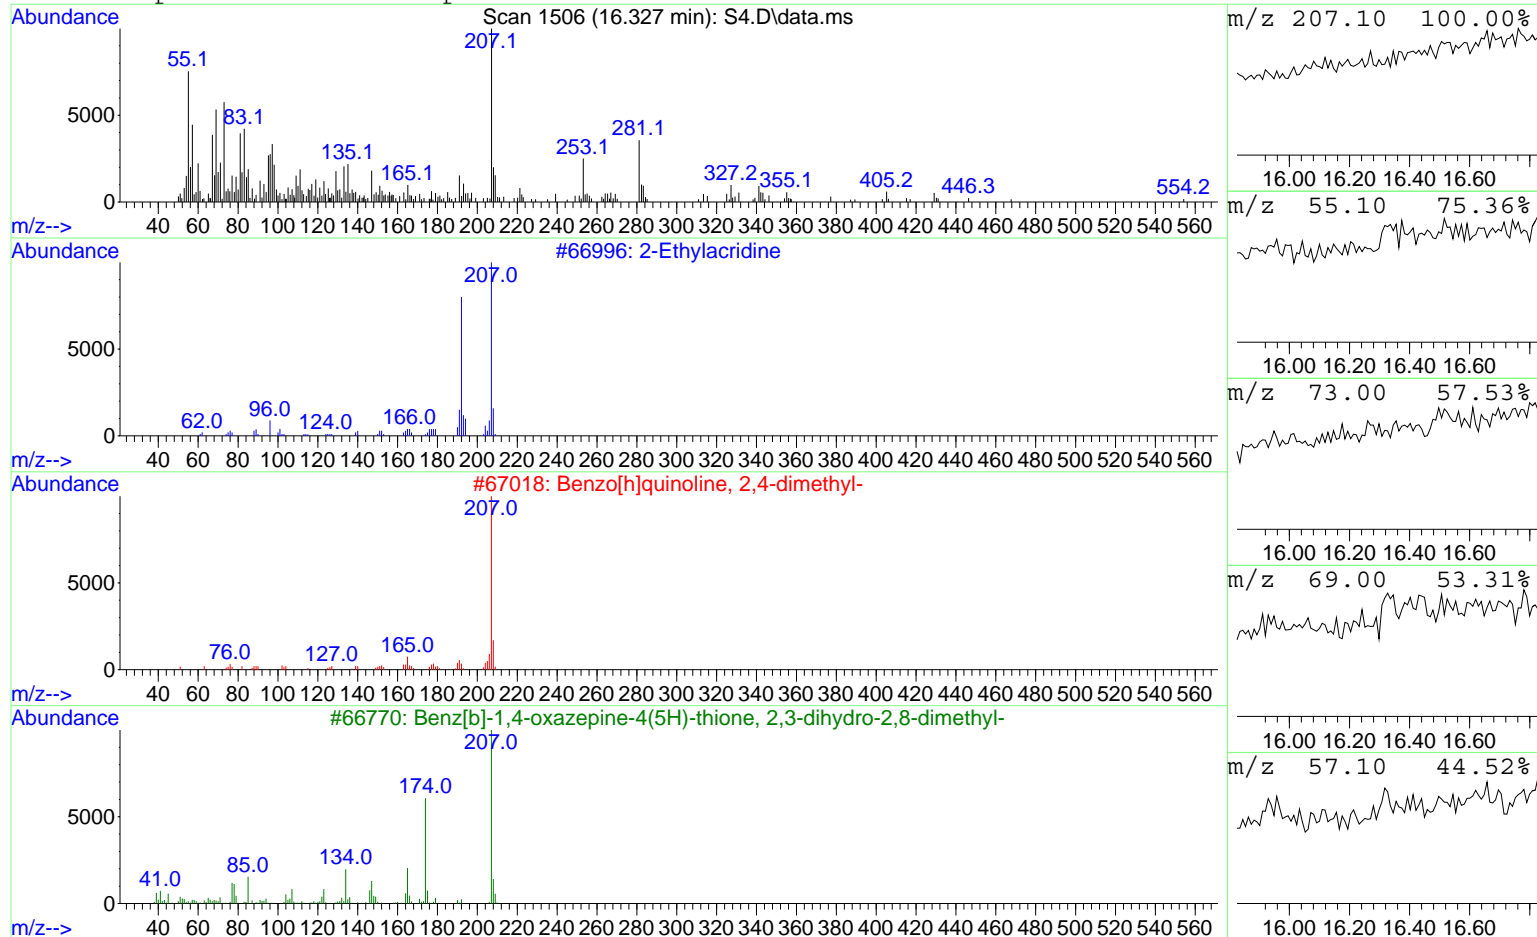

Data File: D:\Data\anjac\2015\ANJAC\noorul islam univ\S4.D

Sample : S4

Peak Number: 1 at 16.327 min Area: 520353 Area % 10.11

The 3 best hits from each library.

Ref\# CAS\# Qual

D:\MassHunter\Library\NIST11.L

| Ref\# | CAS\#              | Qual |
|-------|--------------------|------|
| 1     | 66996 055751-83-2  | 50   |
| 2     | 67018 000605-67-4  | 46   |
| 3     | 66770 1000258-63-4 | 45   |

## Unknown Spectrum based on Apex

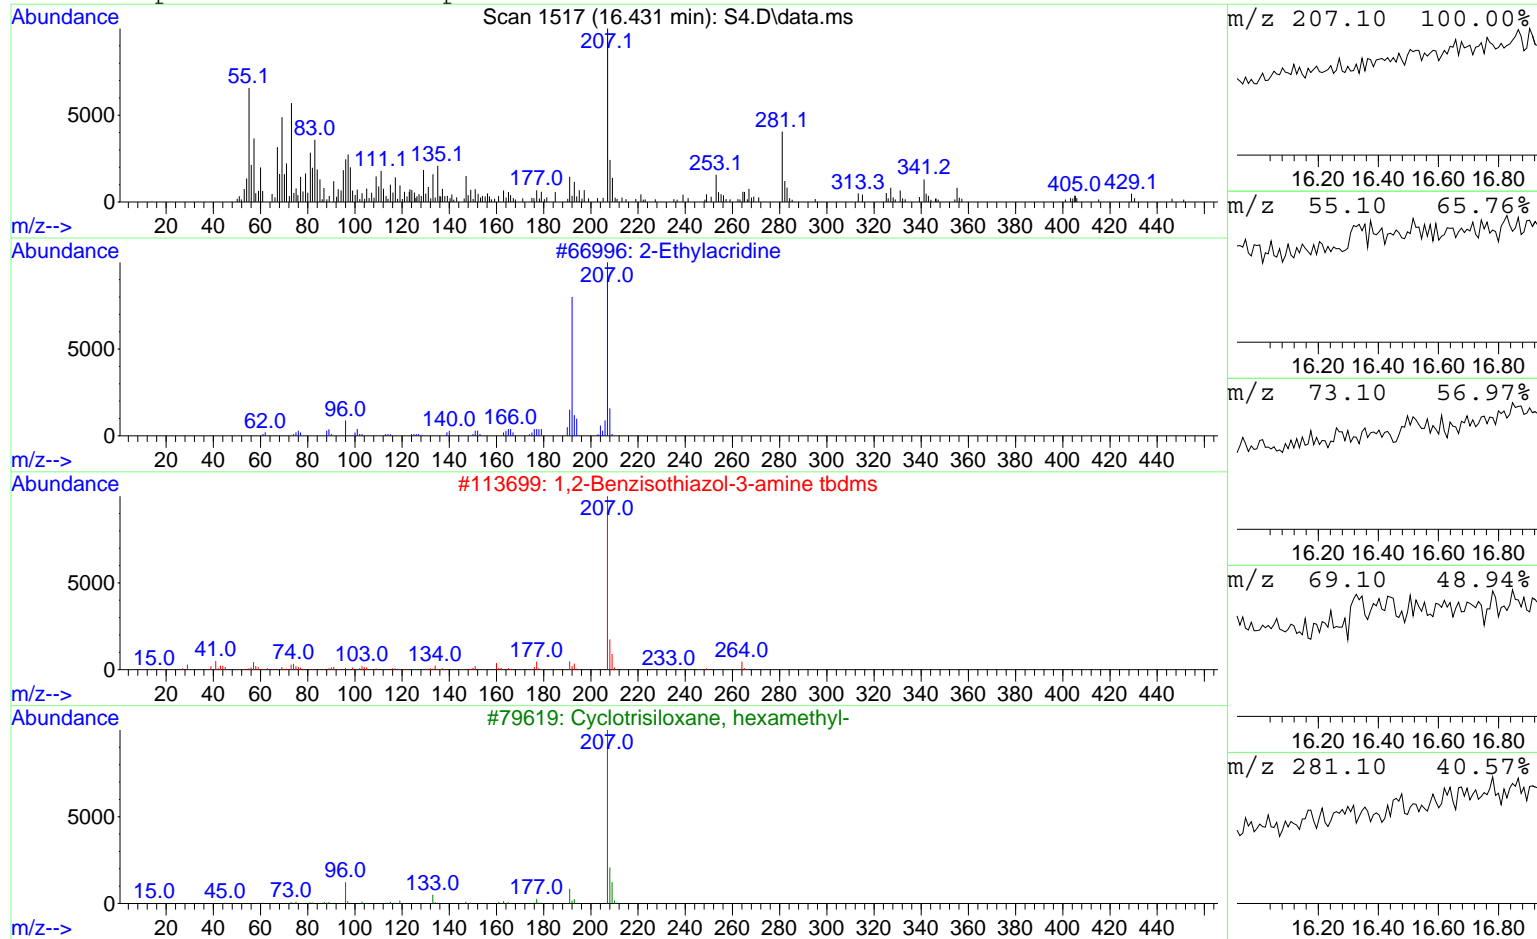

Data File: D:\Data\anjac\2015\ANJAC\noorul islam univ\S4.D

Sample : S4

Peak Number: 2 at 16.431 min Area: 490749 Area % 9.54

The 3 best hits from each library.

Ref\# CAS\# Qual

D:\MassHunter\Library\NIST11.L

| Ref\# | CAS\#               | Qual |
|-------|---------------------|------|
| 1     | 66996 055751-83-2   | 38   |
| 2     | 113699 1000332-57-2 | 38   |
| 3     | 79619 000541-05-9   | 35   |

## Unknown Spectrum based on Apex

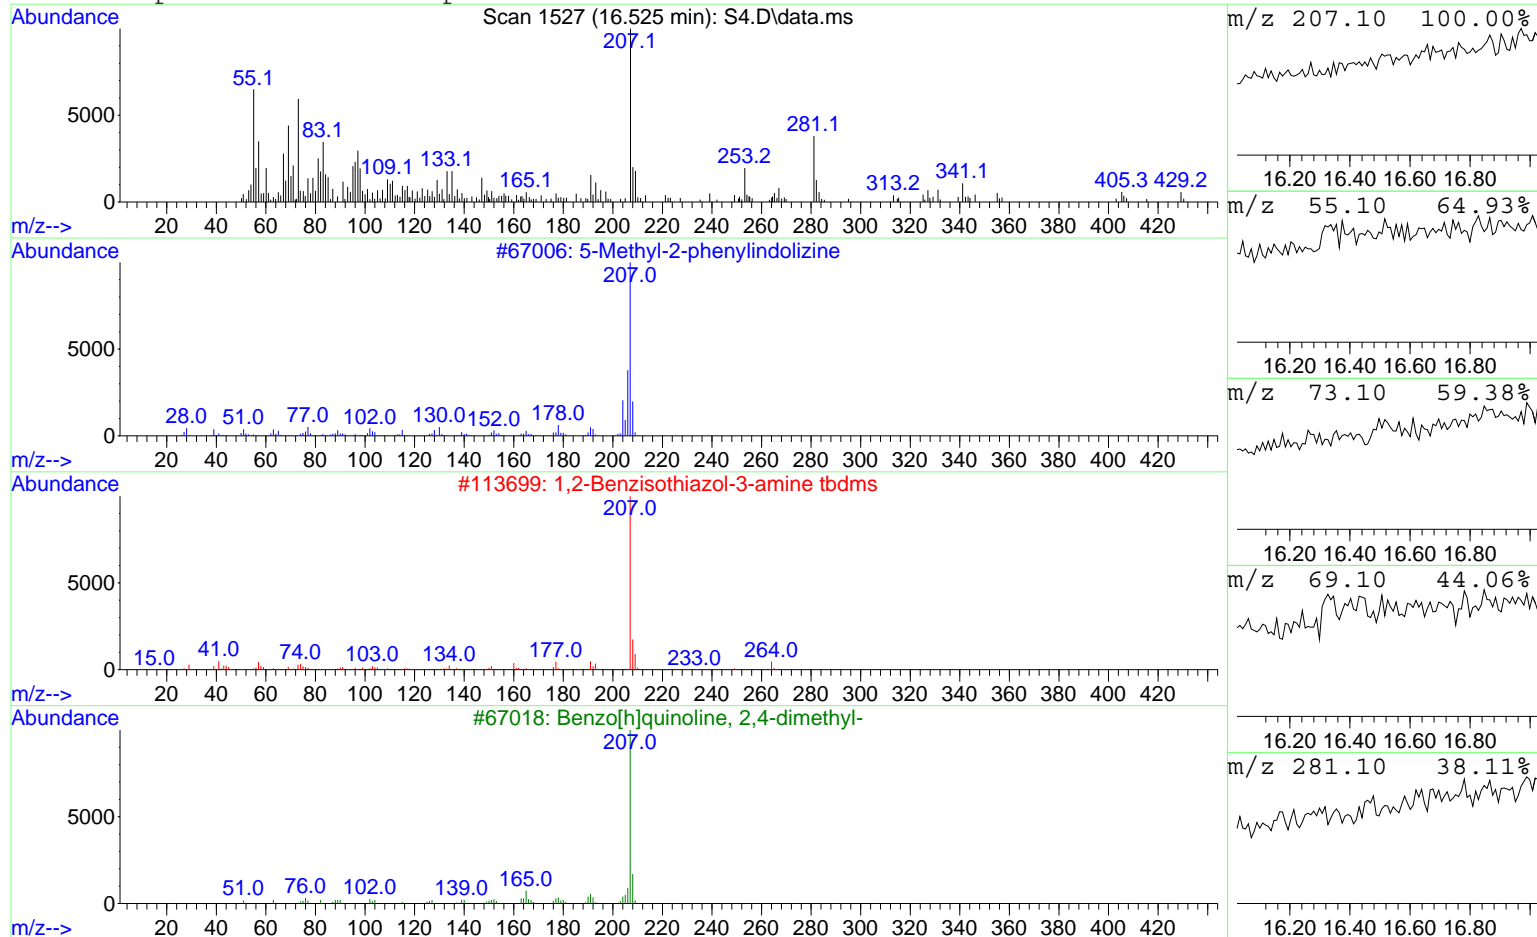

Data File: D:\Data\anjac\2015\ANJAC\noorul islam univ\S4.D

Sample : S4

Peak Number: 3 at 16.525 min Area: 458790 Area % 8.92

The 3 best hits from each library.

Ref\# CAS\# Qual

D:\MassHunter\Library\NIST11.L

| Ref\# | CAS\#               | Qual |
|-------|---------------------|------|
| 1     | 67006 036944-99-7   | 38   |
| 2     | 113699 1000332-57-2 | 38   |
| 3     | 67018 000605-67-4   | 38   |

## Unknown Spectrum based on Apex

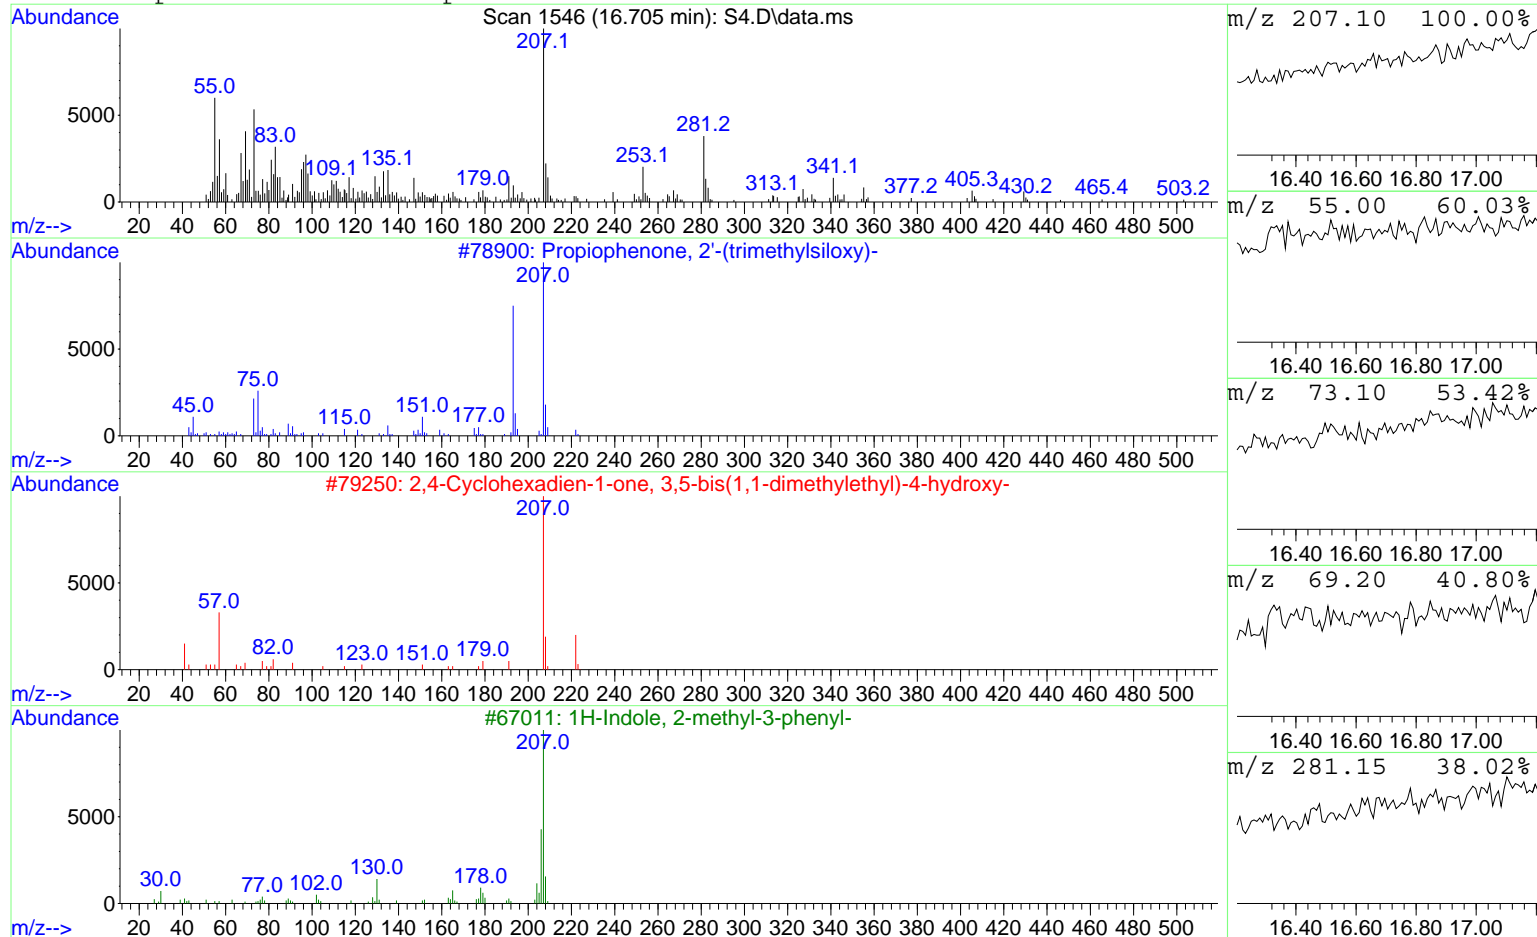

Data File: D:\Data\anjac\2015\ANJAC\noorul islam univ\S4.D

Sample : S4

Peak Number: 4 at 16.705 min Area: 487392 Area % 9.47

The 3 best hits from each library.

Ref\# CAS\# Qual

D:\MassHunter\Library\NIST11.L

| Ref\# | CAS\#             | Qual |
|-------|-------------------|------|
| 1     | 78900 033342-87-9 | 45   |
| 2     | 79250 054965-43-4 | 45   |
| 3     | 67011 004757-69-1 | 45   |

## Unknown Spectrum based on Apex

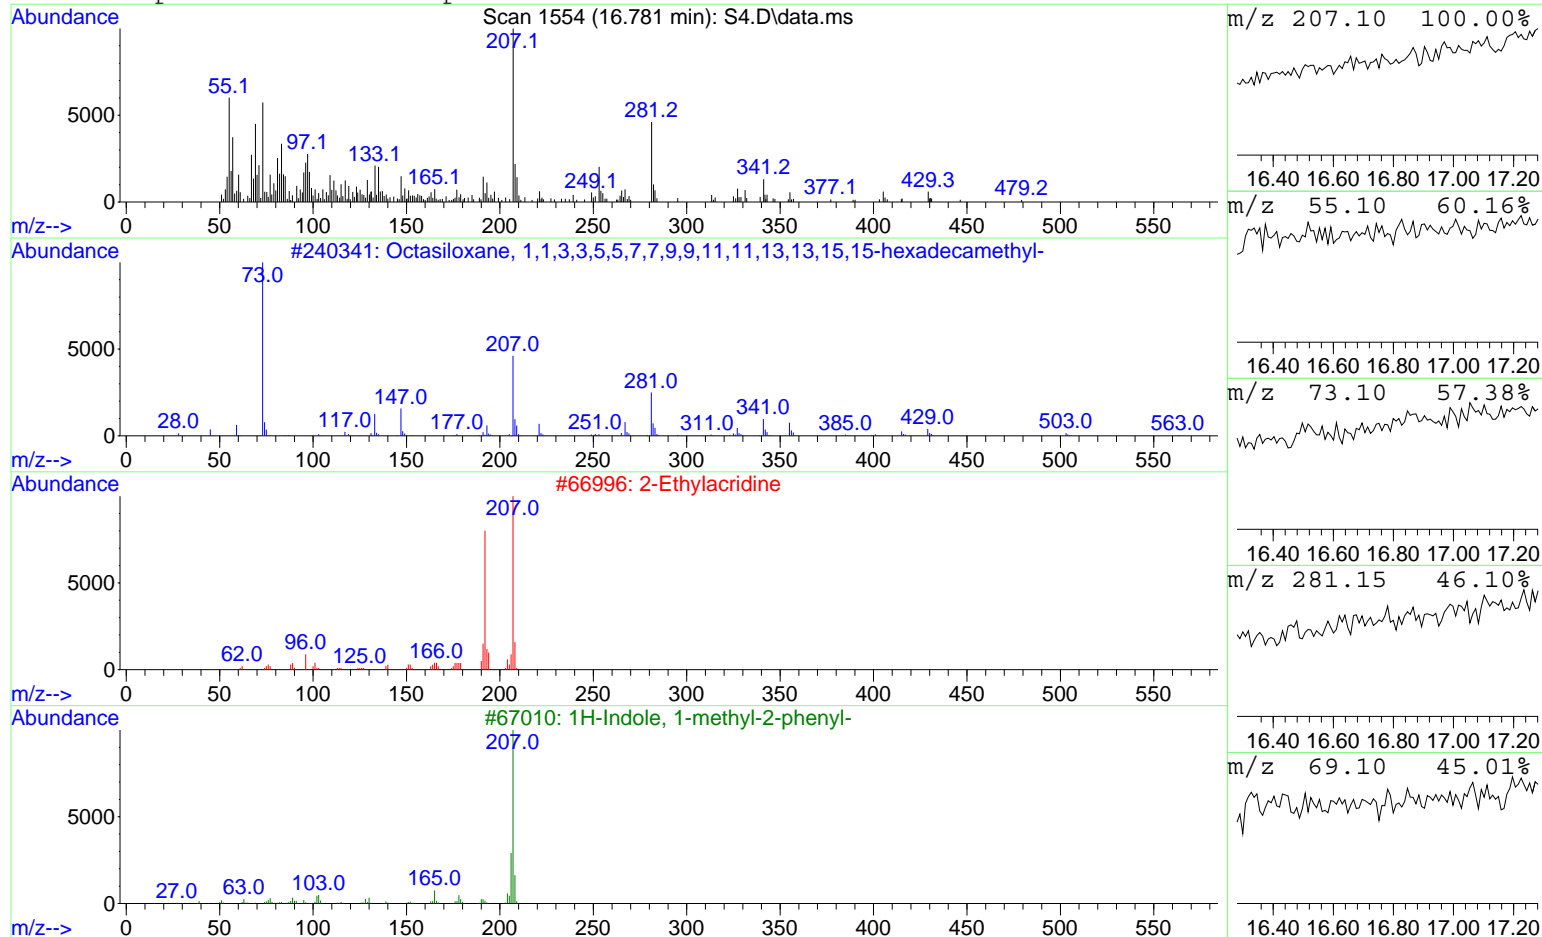

Data File: D:\Data\anjac\2015\ANJAC\noorul islam univ\S4.D

Sample : S4

Peak Number: 5 at 16.781 min Area: 292451 Area % 5.68

The 3 best hits from each library.

Ref\# CAS\# Qual

D:\MassHunter\Library\NIST11.L

| Ref\# | CAS\#              | Qual |
|-------|--------------------|------|
| 1     | 240341 019095-24-0 | 53   |
| 2     | 66996 055751-83-2  | 43   |
| 3     | 67010 003558-24-5  | 43   |

## Unknown Spectrum based on Apex

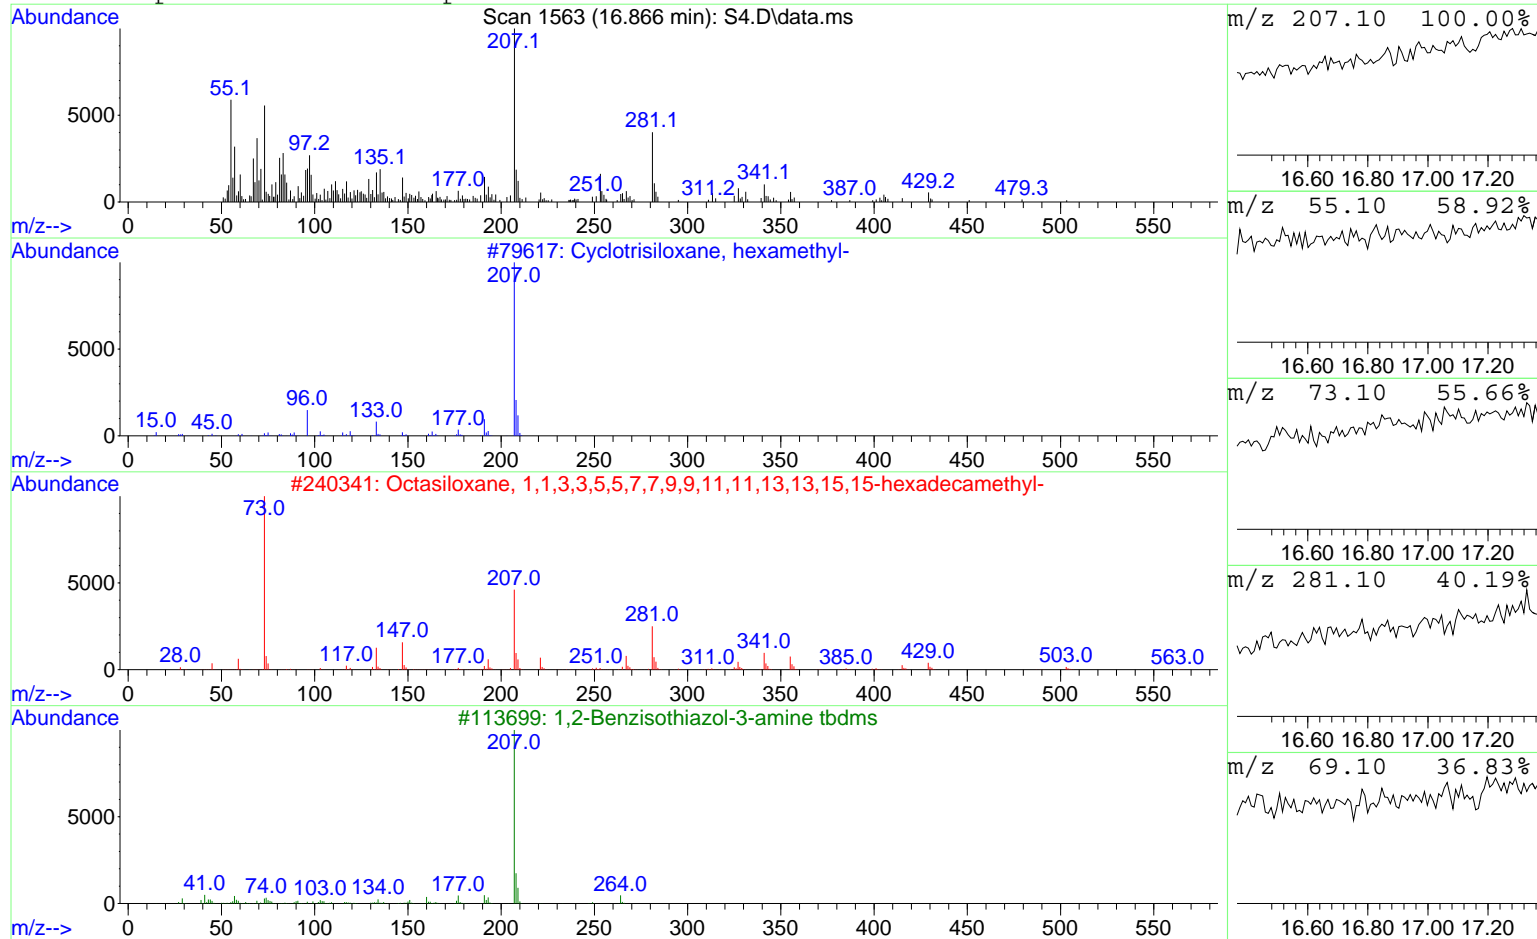

Data File: D:\Data\anjac\2015\ANJAC\noorul islam univ\S4.D

Sample : S4

Peak Number: 6 at 16.866 min Area: 464258 Area % 9.02

The 3 best hits from each library.

Ref\# CAS\# Qual

D:\MassHunter\Library\NIST11.L

| Ref\# | CAS\#               | Qual |
|-------|---------------------|------|
| 1     | 79617 000541-05-9   | 43   |
| 2     | 240341 019095-24-0  | 43   |
| 3     | 113699 1000332-57-2 | 41   |

## Unknown Spectrum based on Apex

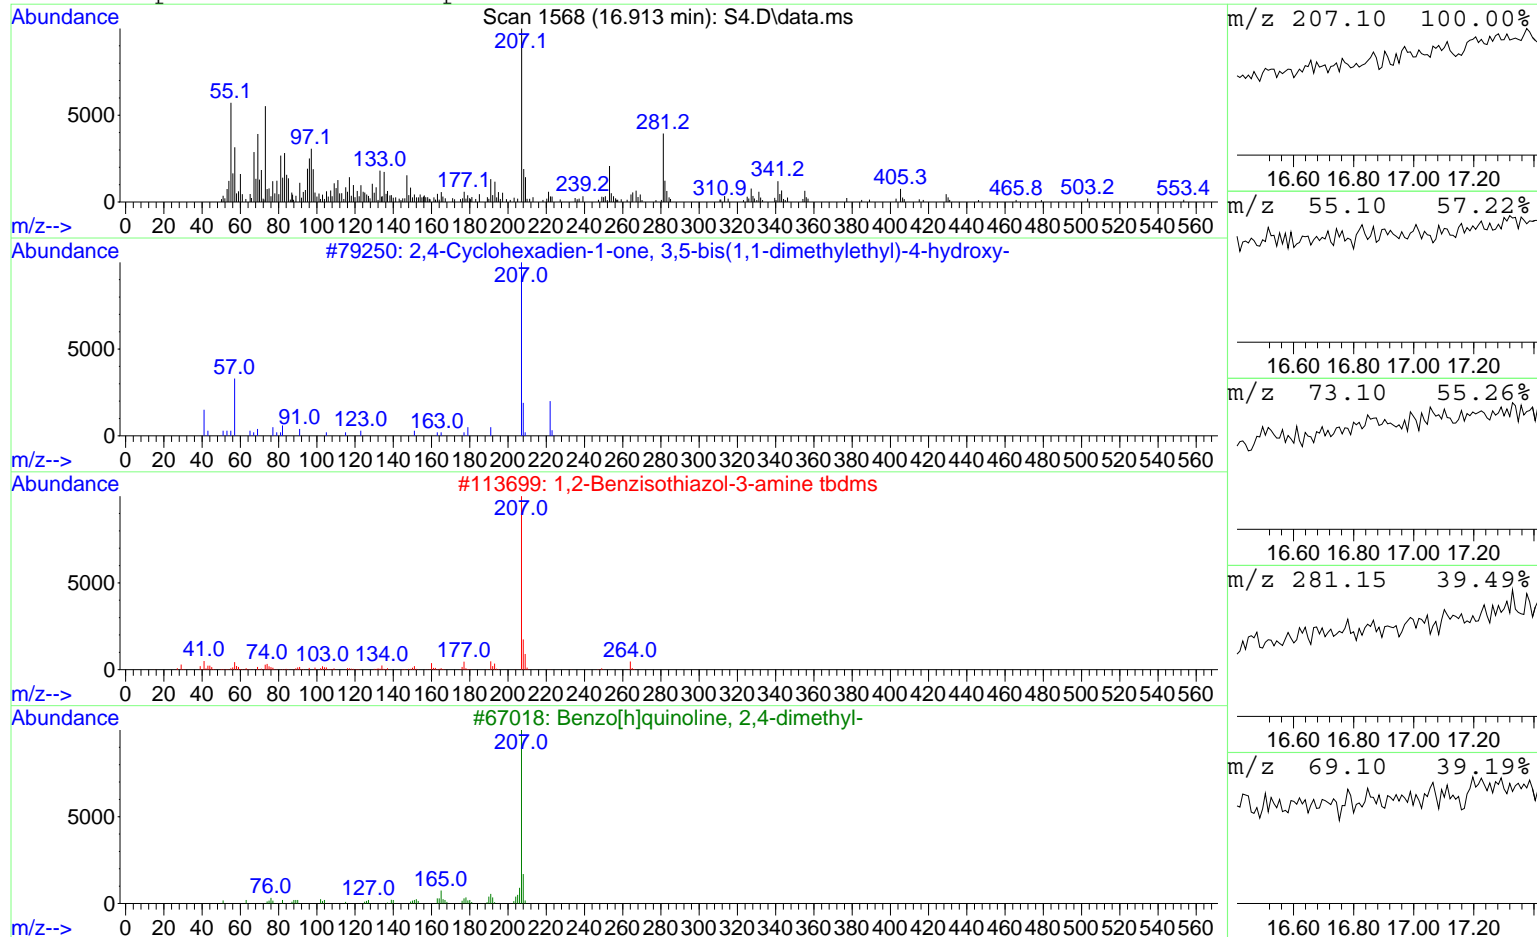

Data File: D:\Data\anjac\2015\ANJAC\noorul islam univ\S4.D  
Sample : S4

Peak Number: 7 at 16.913 min Area: 413091 Area % 8.03

The 3 best hits from each library.

|                                | Ref\#  | CAS\#        | Qual |
|--------------------------------|--------|--------------|------|
| D:\MassHunter\Library\NIST11.L |        |              |      |
| 1                              | 79250  | 054965-43-4  | 50   |
| 2                              | 113699 | 1000332-57-2 | 45   |
| 3                              | 67018  | 000605-67-4  | 45   |



## Unknown Spectrum based on Apex

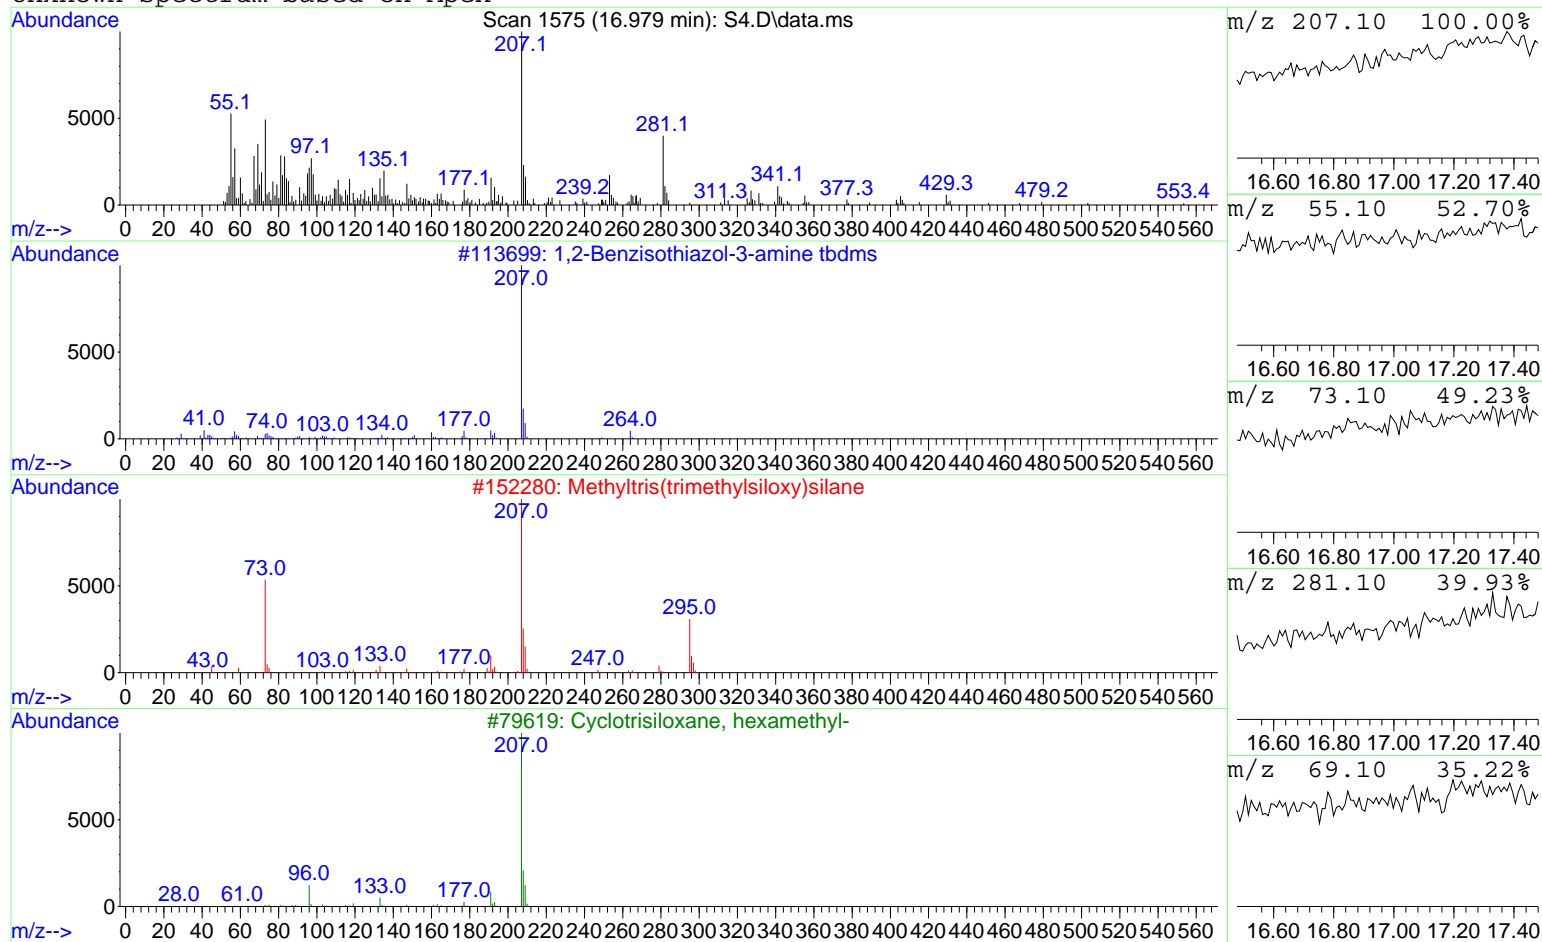

Data File: D:\Data\anjac\2015\ANJAC\noorul islam univ\S4.D

Sample : S4

Peak Number: 8 at 16.979 min Area: 375781 Area % 7.30

The 3 best hits from each library.

Ref\# CAS\# Qual

D:\MassHunter\Library\NIST11.L

|   | Ref\#  | CAS\#        | Qual |
|---|--------|--------------|------|
| 1 | 113699 | 1000332-57-2 | 43   |
| 2 | 152280 | 017928-28-8  | 38   |
| 3 | 79619  | 000541-05-9  | 38   |

## Unknown Spectrum based on Apex

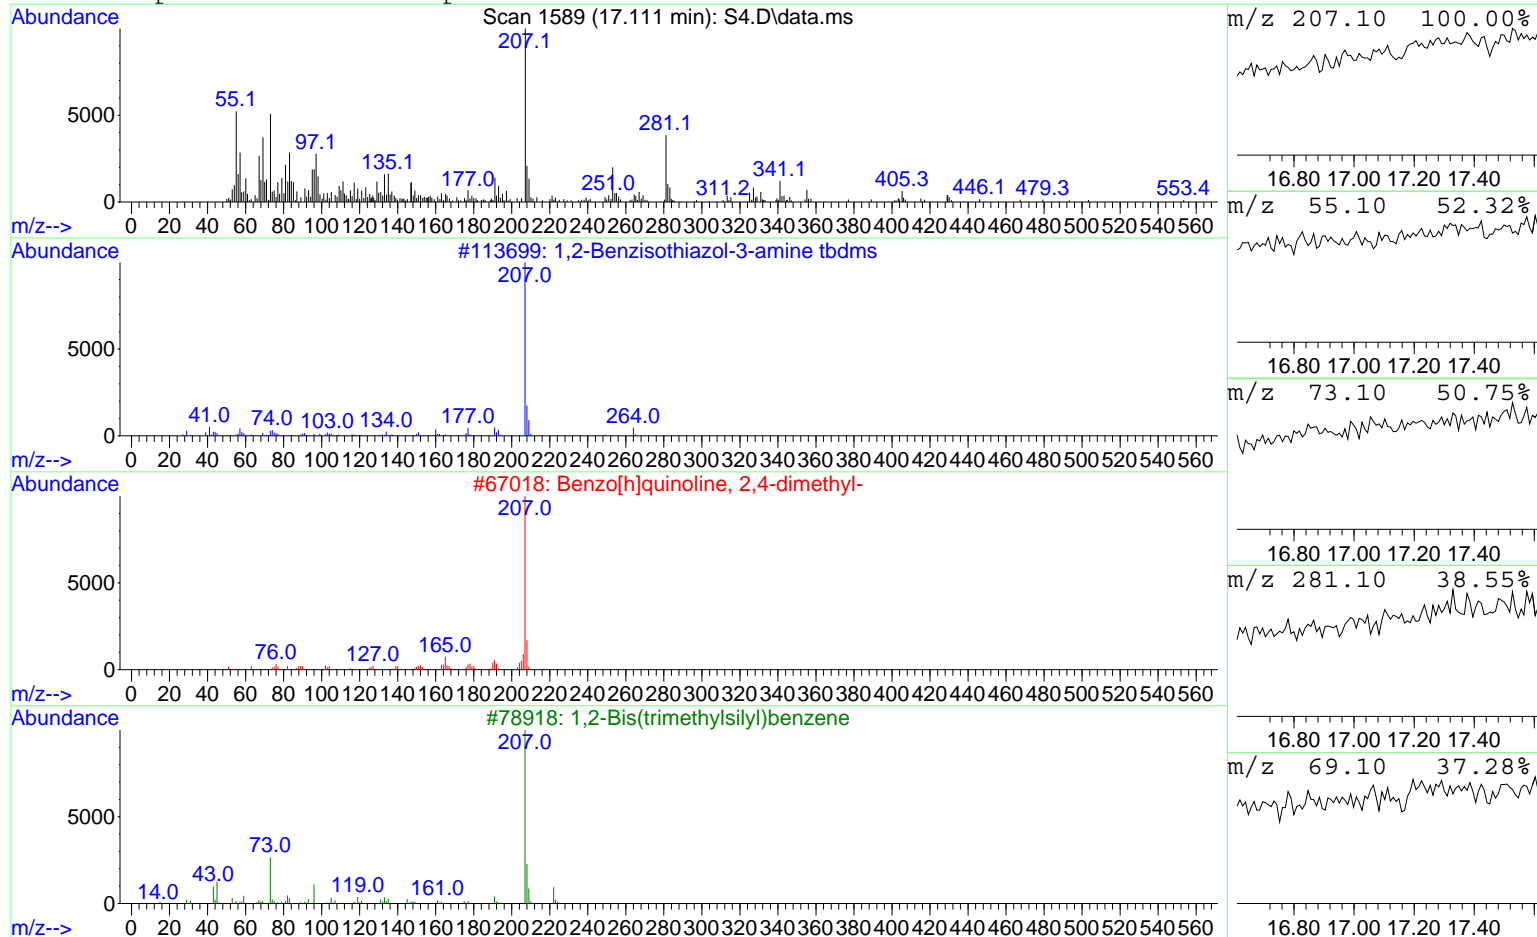

Data File: D:\Data\anjac\2015\ANJAC\noorul islam univ\S4.D

Sample : S4

Peak Number: 9 at 17.111 min Area: 677981 Area % 13.17

The 3 best hits from each library.

Ref\# CAS\# Qual

D:\MassHunter\Library\NIST11.L

|   | Ref\#  | CAS\#        | Qual |
|---|--------|--------------|------|
| 1 | 113699 | 1000332-57-2 | 45   |
| 2 | 67018  | 000605-67-4  | 43   |
| 3 | 78918  | 017151-09-6  | 43   |

## Unknown Spectrum based on Apex

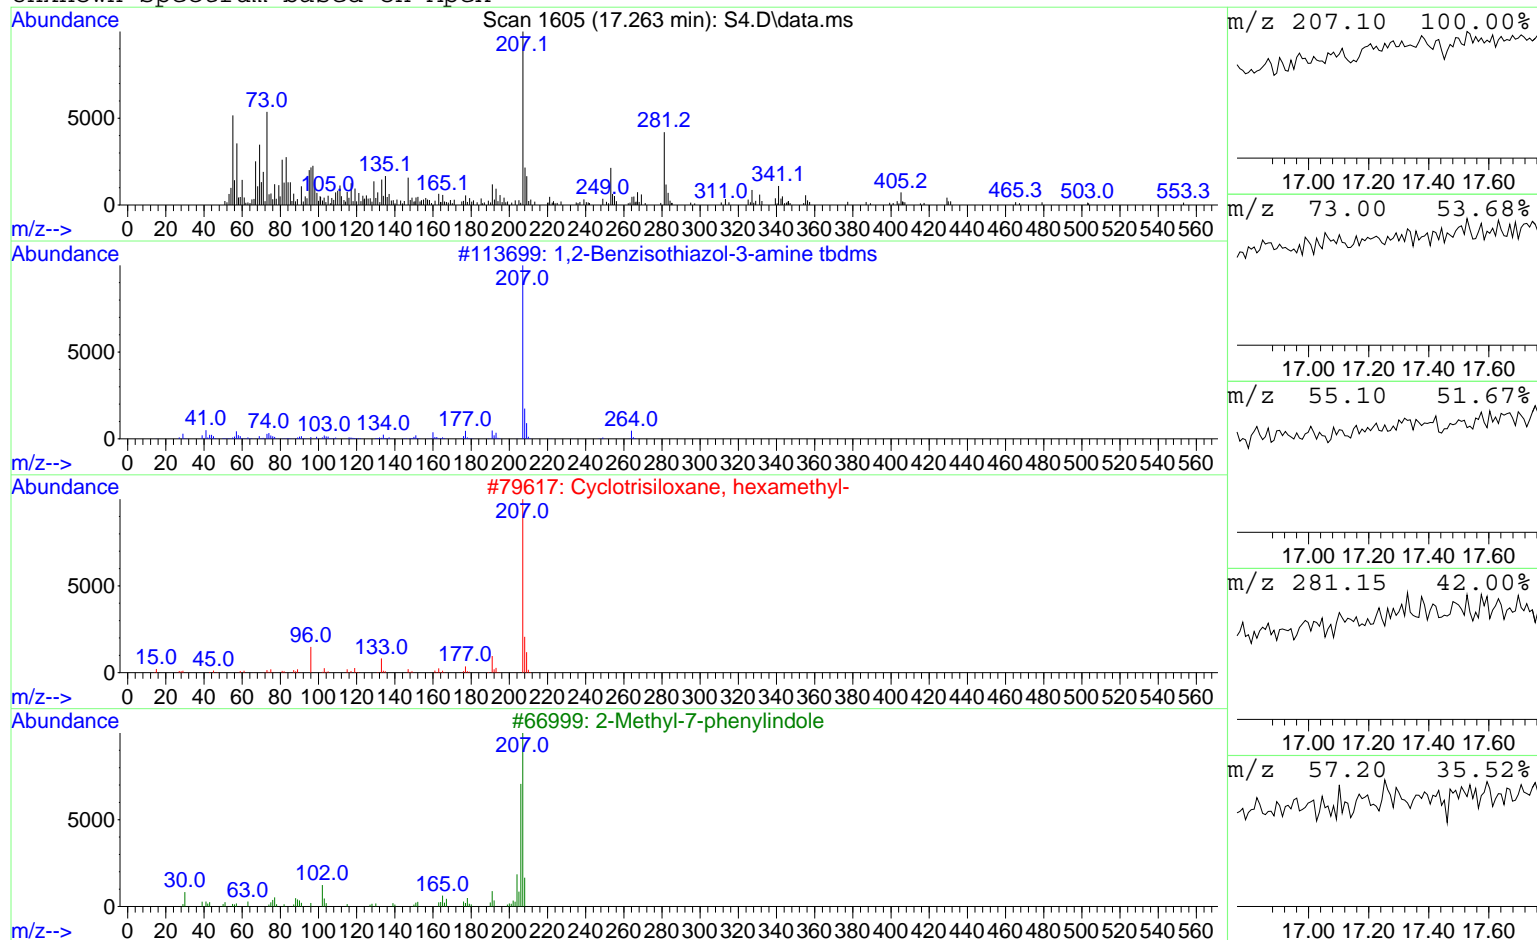

Data File: D:\Data\anjac\2015\ANJAC\noorul islam univ\S4.D  
Sample : S4

Peak Number: 10 at 17.263 min Area: 604813 Area % 11.75

The 3 best hits from each library.

|                                | Ref\#  | CAS\#        | Qual |
|--------------------------------|--------|--------------|------|
| D:\MassHunter\Library\NIST11.L |        |              |      |
| 1                              | 113699 | 1000332-57-2 | 49   |
| 2                              | 79617  | 000541-05-9  | 46   |
| 3                              | 66999  | 001140-08-5  | 43   |

## Unknown Spectrum based on Apex

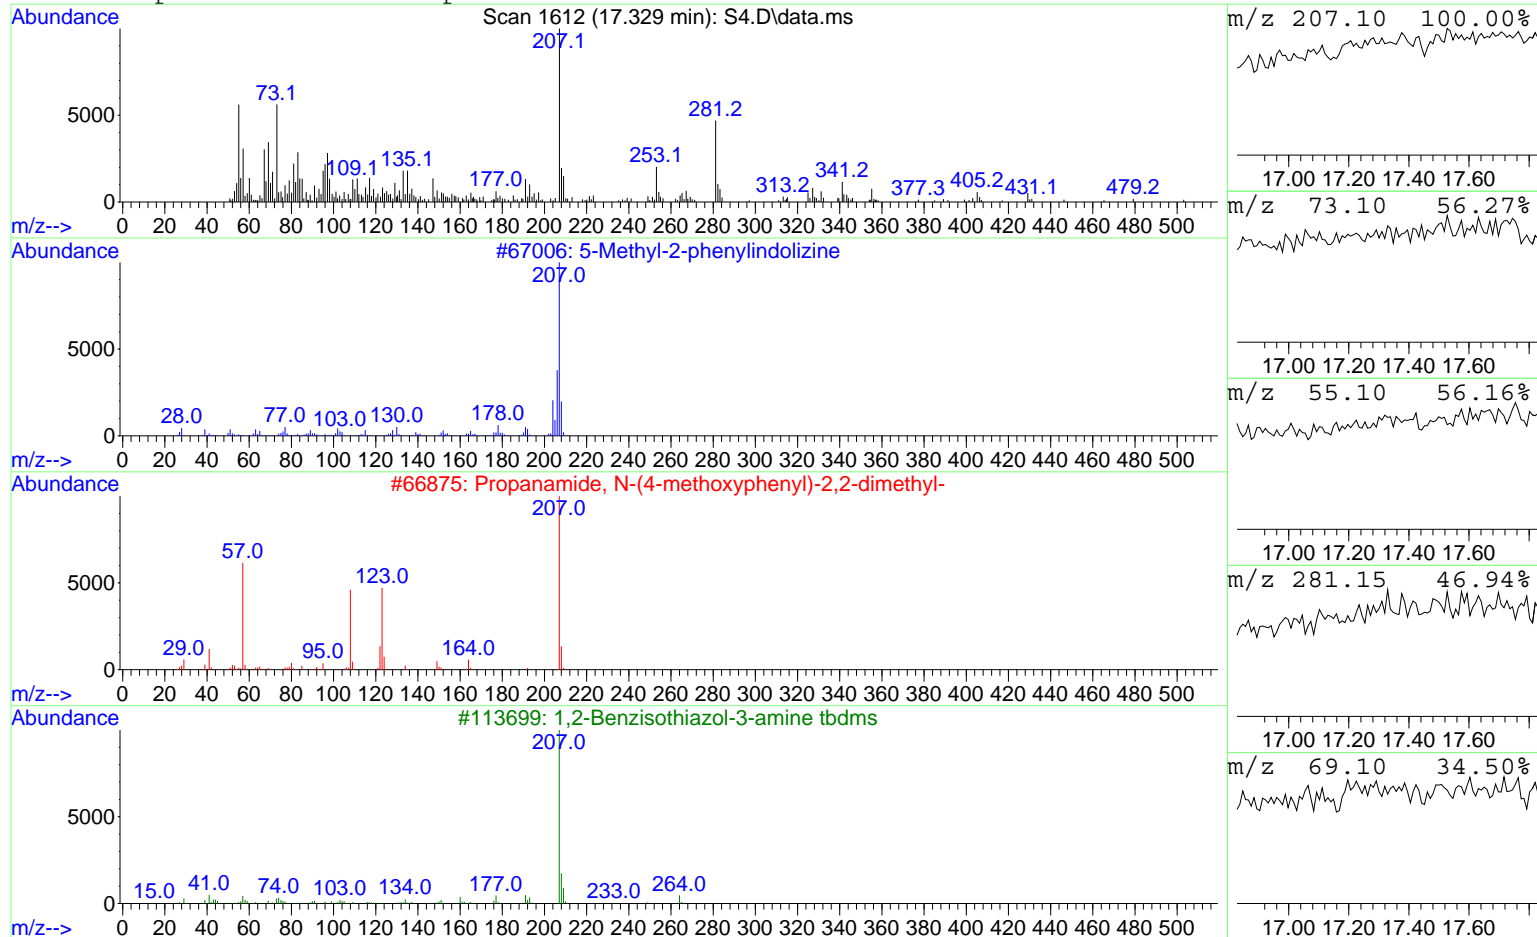

Data File: D:\Data\anjac\2015\ANJAC\noorul islam univ\S4.D

Sample : S4

Peak Number: 11 at 17.329 min Area: 360471 Area % 7.00

The 3 best hits from each library.

Ref\# CAS\# Qual

D:\MassHunter\Library\NIST11.L

| Ref\# | CAS\#               | Qual |
|-------|---------------------|------|
| 1     | 67006 036944-99-7   | 38   |
| 2     | 66875 056619-94-4   | 38   |
| 3     | 113699 1000332-57-2 | 38   |
